# Supplementary material
Source: PubMed Central journal article supplement (PMC155677)
Supplement: 1471-2164-4-13-s1.pdf [file 1471-2164-4-13-s1.pdf]

1 ATGAGTGACGGAAATCCAGAGCTCCTGTCAACACGCCAGACCTATAACAGCCAGGGCGAGAGTAACGAACTATGAGATTCTCTCTATA  
1 MetSerAspGlyAsnProGluLeuLeuSerThrSerGlnThrTyrAsnSerGlnGlyGluSerAsnGluAspTyrGluIleProProIle

91 ACGCTCCCAATCTCCCTGAGCCATCCCTCTGCACCTGGGGGATCACGAAGCCGGCTACCCTCGCTGTGTACGGCCTTGCGCCCAAC  
31 ThrProProAsnLeuProGluProSerLeuLeuHisLeuGlyAspHisGluAlaGlyTyrHisSerLeuCysHisGlyLeuAlaProAsn

181 GGTCTGCTCCCTGCCTACTCGTACCAAGCAATGGATCTCCCTGCCATCATGGTGTCCAACATGCTGGCCAGGACGGCCATCTGCTGTCA  
61 GlyLeuLeuProAlaTyrSerTyrGlnAlaMetAspLeuProAlaIleMetValSerAsnMetLeuAlaGlnAspGlyHisLeuLeuSer

271 GGCCAGCTGCCACGATCCAGGAAATGGTCCACTCGGAGGTGGCGGCATATGACTCAGGCCGGCCAGGGCCCTGCTGGGCCGCCCCGGC  
91 SerGlyTyrHisSerLeuCysHisProMetAsnHisAsnGlyLeuLeuProPheHisProGlnThrMetAspLeuProGluIleThrVal

361 ATGTGGCCAGCCACATGAGTGCCTCAGCCAGTCTCAGCTCATCTCCAGATGGGTATCCGGAGTGGCATTGCTCAGGCCTCCCCATCA  
121 GlyGlnLeuProThrIleGlnGluMetValHisSerGluValAlaAlaTyrAspSerGlyArgProGlyProLeuLeuGlyArgProAla

451 CCTCCAGGGAGCAAGTCAGCGACCCCTCTCCATCCAGTTCACACAGGAGGAGGAATCAGATGCCCATTTCAAGGTGCGTGATGTGAA  
151 ProProGlySerLysSerAlaThrProSerProSerSerSerThrGlnGluGluGluSerAspAlaHisPheLysValArgAspValGlu

541 GGGCGTGGCTTCAAGATCTCGGGAGAGAAGACCCCTCAGTGGACCCAGGCAAAAAGGCCAAGAATCCAAGAAGAAGAAGAAGGAC  
181 GlyArgGlyPheLysIleSerGlyGluLysArgProSerValAspProGlyLysLysAlaLysAsnProLysLysLysLysLysLysAsp

631 CCCAATGAGCCACAGAAGCCAGTGTGGCCTACGCTCTCTTCTCAGAGACACTCAGGCTGCCATCAAGGGGCAGAATCCAGTGCCACC  
211 ProAsnGluProGlnLysProValSerAlaTyrAlaLeuPhePheArgAspThrGlnAlaAlaIleLysGlyGlnAsnProSerAlaThr

721 TTTGGAGATGTGTCCAAAATAGTGGCGTCCATGTGGGACAGCCTGGGAGAAGAGCAGAAACAGGCGTATAAGAGGAAGACTGAAGCTGCC  
241 PheGlyAspValSerLysIleValAlaSerMetTrpAspSerLeuGlyGluGluGlnLysGlnAlaTyrLysArgLysThrGluAlaAla

811 AAGAAGGAGTACCTGAAAGCCTTGGCGCCTACAGAGTAGCCTCGTGTCCAAGAGCCCCCGACCAAGGTGAGGCCAAGAACACTCAG  
271 LysLysGluTyrLeuLysAlaLeuAlaAlaTyrArgAlaSerLeuValSerLysSerProProAspGlnGlyGluAlaLysAsnThrGln

901 GCAAACCCACCAGCCAAAATGCTTCCACCCAAGCAGCCCATGTACGCCATGCCCGGCCTGGCTTCTTCTGACGCCCTCCGACCTGCAG  
301 AlaAsnProProAlaLysMetLeuProProLysGlnProMetTyrAlaMetProGlyLeuAlaSerPheLeuThrProSerAspLeuGln

991 GCCTTCGCGAGTGGAGCCTCTCCCGCAGCCTTGCCAGGACGCTGGGCTCCAAGGCCCTGCTGCCGGGCCTCAGCACATCGCCGCCACCA  
331 AlaPheArgSerGlyAlaSerProAlaSerLeuAlaArgThrLeuGlySerLysAlaLeuLeuProGlyLeuSerThrSerProProPro

1081 CCCTCCTTCCCTCTCAGCCCCTCACTGCACCAGCAGCTGCCACTGCCCCCACCAGCGCAGGGCACTCTCCTCAGCCCCTCTCAGCATG  
361 ProSerPheProLeuSerProSerLeuHisGlnGlnLeuProLeuProProHisAlaGlnGlyThrLeuLeuSerProProLeuSerMet

1171 TCCCCAGCCCCGACGCTCCTGTCTCTGCCTGCCATGGCACTCCAGTGCAGCTGGCGATGAGCCCTCACCTCCAGGGCCACAGGAC  
391 SerProAlaProGlnProProValLeuProAlaSerMetAlaLeuGlnValGlnLeuAlaMetSerProSerProProGlyProGlnAsp

1261 TTCCACACATCTCTGATTCTCCAGTGGCTCTGGCTCCCGCTCACCTGGCCATCCAACCCCTCCAGCAGCGGAGACTGGGATGGGAGT  
421 PheProHisIleSerAspPheSerSerGlySerGlySerArgSerProGlyProSerAsnProSerSerSerGlyAspTrpAspGlySer

1351 TACCCAGTGGGGAGCGTGGCCTCGGCACCTGCAGAAGCAGACTCAGGATGCCACCTGAGTTCATGGCCACAGTAGGGCCACATCCAGAA  
451 TyrProSerGlyGluArgGlyLeuGlyThrCysArgSerArgLeuArgMetProProGluPheMetAlaThrValGlyProHisProGlu

1441 TGTCTACACTACAATTTCTACACATACAAATCTCAGCCTGTGAACCAACCAAGCCTCACCTCTGGCTGCCTCCACCTCAGGGAGTG  
481 ThrAlaAlaGlnValValThrGlnAlaMetGluTyrValArgSerGlyCysArgAsnProProProGlnProValAspTrpSerThrAsp

1531 GTGACCATCGCAGCCCACTCCGTTCTACAGTGA  
511 ValThrIleAlaAlaHisSerValLeuGln<U>
